# Supplementary material for: Researchers’ and Research Users’ Experiences With and Reasons for Working Together in Spinal Cord Injury Research Partnerships: A Qualitative Study
Source: PubMed Central journal article supplement (PMC9808362; doi:10.34172/ijhpm.2021.35), 2021-05-11
Supplement: ijhpm-11-1401-s003.pdf [file ijhpm-11-1401-s003.pdf]

**Article title:** Researchers' and Research Users' Experiences With and Reasons for Working Together in Spinal Cord Injury Research Partnerships: A Qualitative Study

**Journal name:** International Journal of Health Policy and Management (IJHPM)

**Authors' information:** Femke Hoekstra<sup>1,2\*</sup>, Lee Schaefer<sup>3</sup>, Peter Athanasopoulos<sup>4</sup>, SCI Guiding Principles Consensus Panel#, Heather L. Gainforth<sup>1,2</sup>

<sup>1</sup>School of Health and Exercise Sciences, University of British Columbia, Kelowna, BC, Canada.

<sup>2</sup>International Collaboration on Repair Discoveries (ICORD), University of British Columbia, Vancouver, BC, Canada.

<sup>3</sup>Department of Kinesiology and Physical Education, McGill University, Montreal, QC, Canada.

<sup>4</sup>Spinal Cord Injury Ontario, Toronto, ON, Canada.

#Members of the SCI Guiding Principles Consensus Panel are listed in the Acknowledgments

(\*Corresponding author: [heather.gainforth@ubc.ca](mailto:heather.gainforth@ubc.ca))

### Supplementary file 3: Members of the SCI Guiding Principles Panel

| Panel member          | Organization(s)                             | Roles and/or background                                                             |
|-----------------------|---------------------------------------------|-------------------------------------------------------------------------------------|
| Kim Anderson          | NASCIC                                      | Researcher + person with lived experience of SCI                                    |
| Hugh Anton            | ICORD, UBC                                  | Researcher + clinician                                                              |
| Peter Athanasopoulos  | SCI Ontario, Ontario SCI Solutions Alliance | Leadership role in SCI community organization + person with lived experience of SCI |
| John Chernesky        | Praxis Research Institute, NASCIC           | Leadership role in funding organization + person with lived experience of SCI       |
| Susan Forwell         | ICORD, UBC                                  | Clinician + researcher                                                              |
| Jocelyn Maffin        | SCI BC                                      | Representative from community organisation + person with lived experience of SCI    |
| Kathleen Martin Ginis | ICORD, UBC                                  | Researcher                                                                          |
| Christopher B McBride | SCI Canada, SCI BC                          | Executive director of a community organization                                      |
| W. Ben Mortenson      | ICORD, UBC                                  | Researcher with clinical background                                                 |
| Rhonda Willms         | ICORD, GF Strong, UBC                       | Clinician + researcher                                                              |

*Notes:* The SCI Guiding Principles Consensus Panel was established in 2017. NASCIC = North American SCI Consumer Consortium; ICORD = International Collaboration on Repair Discoveries; UBC = University of British Columbia; SCI = Spinal Cord Injury;
