# Supplementary material for: Researchers’ and Research Users’ Experiences With and Reasons for Working Together in Spinal Cord Injury Research Partnerships: A Qualitative Study
Source: PubMed Central journal article supplement (PMC9808362; doi:10.34172/ijhpm.2021.35), 2021-05-11
Supplement: ijhpm-11-1401-s005.pdf [file ijhpm-11-1401-s005.pdf]

**Article title:** Researchers' and Research Users' Experiences With and Reasons for Working Together in Spinal Cord Injury Research Partnerships: A Qualitative Study

**Journal name:** International Journal of Health Policy and Management (IJHPM)

**Authors' information:** Femke Hoekstra<sup>1,2\*</sup>, Lee Schaefer<sup>3</sup>, Peter Athanasopoulos<sup>4</sup>, SCI Guiding Principles Consensus Panel#, Heather L. Gainforth<sup>1,2</sup>

<sup>1</sup>School of Health and Exercise Sciences, University of British Columbia, Kelowna, BC, Canada.

<sup>2</sup>International Collaboration on Repair Discoveries (ICORD), University of British Columbia, Vancouver, BC, Canada.

<sup>3</sup>Department of Kinesiology and Physical Education, McGill University, Montreal, QC, Canada.

<sup>4</sup>Spinal Cord Injury Ontario, Toronto, ON, Canada.

#Members of the SCI Guiding Principles Consensus Panel are listed in the Acknowledgments (\*Corresponding author: [heather.gainforth@ubc.ca](mailto:heather.gainforth@ubc.ca))

**Supplementary file 5:** Role of Critical Friends in the Analyses Process.

The table below outlines key topics discussed during reflective discussions between first author and co-authors, who acted as critical friends.

| <b>Activity</b>                               | <b>Who</b>  | <b>Reflective discussions and key decisions</b>                                                                                                                                                                                                                                                                                                                                                                                                                               |
|-----------------------------------------------|-------------|-------------------------------------------------------------------------------------------------------------------------------------------------------------------------------------------------------------------------------------------------------------------------------------------------------------------------------------------------------------------------------------------------------------------------------------------------------------------------------|
| <i>Discussions of narrative summaries</i>     | FH + HG     | Lead authors discussed narrative summaries of participants, in which HG asked critical questions about data and provided interpretation. HG provided several suggestions for several theories/framework and relevant literature that could be linked to the data (e.g., transformational leadership theory and social cognitive theory).<br>HG + FH decided to not present narrative types in the manuscript, as that would potentially breach participants' confidentiality. |
| <i>Discussion of narrative approaches</i>     | FH + LS     | FH + LS discussed findings and options to organize and present the narrative data.                                                                                                                                                                                                                                                                                                                                                                                            |
| <i>Discussions of threads and sub-threads</i> | FH + HG     | Lead authors discussed identified threads and sub-threads, and decided to link the data to components of the transformational leadership theory.                                                                                                                                                                                                                                                                                                                              |
| <i>Discussions of threads and sub-threads</i> | FH + LS     | First author discussed the identified threads, sub-threads, and the link with transformational leadership theory with LS. LS mentioned that the link with the theory was not very clear from the presented data.                                                                                                                                                                                                                                                              |
| <i>Discussions of threads and sub-threads</i> | FH + PA     | First author discussed the findings with PA (community partner). Figure 1 guided the discussion. PA suggested to distinguish findings between researchers, research users and people with SCI.                                                                                                                                                                                                                                                                                |
| <i>Refinement of threads and sub-threads</i>  | FH + HG     | Lead authors re-organized the threads and sub-threads using pieces of papers (with quotes and threads) and scissors. HG + FH discussed potential capacity building strategies for research partnerships based on the findings and decided to focus the discussion section on these potential capacity building strategies.                                                                                                                                                    |
| <i>Refinement of threads and sub-threads</i>  | FH + LS     | FH + LS discussed the findings and re-ordered the threads. LS provided specific suggestions to improve the structure of the result section in a way that it better aligned with our narrative approach. LS also provided suggestions to clarify Figure 1.                                                                                                                                                                                                                     |
| <i>Finalizing manuscript</i>                  | All authors | All co-authors provided feedback and editorial changes to the manuscript via email.                                                                                                                                                                                                                                                                                                                                                                                           |
